# Supplementary material
Source: PubMed Central journal article supplement (PMC4191584)
Supplement: jm500872p_si_001.pdf [file jm500872p_si_001.pdf]

## Supporting Information

### ***In vivo* imaging of histone deacetylases (HDACs) in the central nervous system and major peripheral organs**

Changning Wang<sup>1</sup>, Frederick A. Schroeder<sup>1, 2</sup>, Hsiao-Ying Wey<sup>1</sup>, Ronald Borra<sup>1</sup>, Florence F. Wagner<sup>3</sup>, Surya Reis<sup>2</sup>, Sung Won Kim<sup>4</sup>, Stephen J. Haggarty<sup>2</sup>, Edward B. Holson<sup>3</sup>, Jacob M. Hooker<sup>1,\*</sup>

<sup>1</sup> Athinoula A. Martinos Center for Biomedical Imaging, Department of Radiology, Massachusetts General Hospital, Harvard Medical School, Charlestown, Massachusetts, 02129

<sup>2</sup> Chemical Neurobiology Laboratory, Departments of Neurology and Psychiatry, Center for Human Genetic Research, Massachusetts General Hospital, 185 Cambridge Street, Boston, Massachusetts, 02114

<sup>3</sup> Stanley Center for Psychiatric Research, Broad Institute of Harvard and MIT, 7 Cambridge Center, Cambridge, Massachusetts, 02142

<sup>4</sup> Laboratory of Neuroimaging, National Institute on Alcohol Abuse and Alcoholism, Bethesda, MD 20892

## Table of Contents

**Table S1.** Screening of **6** against 80 common CNS drug targets and 4 zinc-dependent enzymes reveals limited off-target binding.

**Figures S1.** Characterization of [<sup>11</sup>C]**6**: *in vitro* properties and *ex vivo* binding.

**Figures S2.** *In vivo* PET imaging confirms acute **6** does not modulate dopamine transporter (DAT) binding/occupancy.

**Figures S3.** Rodent *in vivo* PET imaging with [<sup>11</sup>C]**6** reveals robust and blockable uptake in brain.

**Figures S4.** [<sup>11</sup>C]**6** binding in rat brain is not altered by Pgp inhibition and is reversible.

**Figures S5.** Radioactive signal from [<sup>11</sup>C]**6** is dominated by lasting presence of parent compound.

**Figures S6.** Organ-specific uptake of [<sup>11</sup>C]**6** in baboon is blocked by SAHA treatment.

**Table S1:** Screening of **6** against 80 common CNS drug targets and 4 zinc-dependent enzymes reveals limited off-target binding.

| Receptor Assay                                   | % Inhibition of Control Specific Binding | Reference Compounds |
|--------------------------------------------------|------------------------------------------|---------------------|
| A1 (h) (antagonist radioligand)                  | 5                                        | DPCPX               |
| A2A (h) (agonist radioligand)                    | 16                                       | NECA                |
| A3 (h) (agonist radioligand)                     | 15                                       | IB-MECA             |
| alpha 1 (non-selective) (antagonist radioligand) | -2                                       | prazosin            |
| alpha 2 (non-selective) (antagonist radioligand) | -7                                       | yohimbine           |
| beta 1 (h) (agonist radioligand)                 | -11                                      | atenolol            |
| beta 2 (h) (agonist radioligand)                 | 0                                        | ICI 118551          |
| AT1 (h) (antagonist radioligand)                 | 0                                        | saralasin           |
| AT2 (h) (agonist radioligand)                    | 45                                       | angiotensin-II      |
| BZD (central) (agonist radioligand)              | -17                                      | diazepam            |
| BZD (peripheral) (antagonist radioligand)        | 4                                        | PK 11195            |
| BB (non-selective) (agonist radioligand)         | -16                                      | bombesin            |
| B2 (h) (agonist radioligand)                     | 6                                        | NPC 567             |
| CGRP (h) (agonist radioligand)                   | -8                                       | hCGRPalpha          |
| CB1 (h) (agonist radioligand)                    | 17                                       | CP 55940            |
| CCK1 (CCKA) (h) (agonist radioligand)            | 0                                        | CCK-8s              |
| CCK2 (CCKB) (h) (agonist radioligand)            | -8                                       | CCK-8s              |
| D1 (h) (antagonist radioligand)                  | -4                                       | SCH 23390           |
| D2S (h) (antagonist radioligand)                 | 17                                       | (+)butaclamol       |
| D3 (h) (antagonist radioligand)                  | -8                                       | (+)butaclamol       |
| D4.4 (h) (antagonist radioligand)                | -4                                       | clozapine           |
| D5 (h) (antagonist radioligand)                  | -1                                       | SCH 23390           |
| ETA (h) (agonist radioligand)                    | -8                                       | endothelin-1        |
| ETB (h) (agonist radioligand)                    | -5                                       | endothelin-3        |
| GABA (non-selective) (agonist radioligand)       | 6                                        | GABA                |
| GAL1 (h) (agonist radioligand)                   | -9                                       | galanin             |
| GAL2 (h) (agonist radioligand)                   | 1                                        | galanin             |
| PDGF (agonist radioligand)                       | -10                                      | PDGF BB             |
| CXCR2 (IL-8B) (h) (agonist radioligand)          | -1                                       | IL-8                |
| CCR1 (h) (agonist radioligand)                   | 6                                        | MIP-1alpha          |
| H1 (h) (antagonist radioligand)                  | -7                                       | pyrilamine          |
| H2 (h) (antagonist radioligand)                  | 15                                       | cimetidine          |
| MC4 (h) (agonist radioligand)                    | 7                                        | NDP-alpha -MSH      |
| MT1 (ML1A) (h) (agonist radioligand)             | 0                                        | melatonin           |
| M1 (h) (antagonist radioligand)                  | -5                                       | pirenzepine         |
| M2 (h) (antagonist radioligand)                  | -12                                      | methocramine        |
| M3 (h) (antagonist radioligand)                  | 6                                        | 4-DAMP              |

|                                                                                          |     |                                                               |
|------------------------------------------------------------------------------------------|-----|---------------------------------------------------------------|
| M4 (h) (antagonist radioligand)                                                          | 0   | 4-DAMP                                                        |
| M5 (h) (antagonist radioligand)                                                          | -4  | 4-DAMP                                                        |
| NK1 (h) (agonist radioligand)                                                            | -10 | [Sar <sup>9</sup> , (Met (O <sub>2</sub> ) <sup>11</sup> )-SP |
| NK2 (h) (agonist radioligand)                                                            | -4  | [Nleu10]-NKA (4-10)                                           |
| NK3 (h) (antagonist radioligand)                                                         | 0   | SB 222200                                                     |
| Y1 (h) (agonist radioligand)                                                             | -13 | NPY                                                           |
| Y2 (h) (agonist radioligand)                                                             | -13 | NPY                                                           |
| NTS1 (NT1) (h) (agonist radioligand)                                                     | -5  | neurotensin                                                   |
| delta 2 (DOP) (h) (agonist radioligand)                                                  | 2   | DPDPE                                                         |
| kappa (KOP) (agonist radioligand)                                                        | 0   | U 50488                                                       |
| mu (MOP) (h) (agonist radioligand)                                                       | -11 | DAMGO                                                         |
| NOP (ORL1) (h) (agonist radioligand)                                                     | 5   | nociceptin                                                    |
| PAC1 (PACAP) (h) (agonist radioligand)                                                   | 6   | PACAP1-38                                                     |
| PPARgamma (h) (agonist radioligand)                                                      | 0   | rosiglitazone                                                 |
| PCP (antagonist radioligand)                                                             | 4   | MK 801                                                        |
| EP2 (h) (agonist radioligand)                                                            | 0   | PGE2                                                          |
| EP4 (h) (agonist radioligand)                                                            | 3   | PGE2                                                          |
| IP (PGI2) (h) (agonist radioligand)                                                      | -17 | iloprost                                                      |
| P2X (agonist radioligand)                                                                | 8   | alpha ,beta -MeATP                                            |
| P2Y (agonist radioligand)                                                                | 13  | dATPalpha S                                                   |
| 5-HT1A (h) (agonist radioligand)                                                         | 2   | 8-OH-DPAT                                                     |
| 5-HT1B (antagonist radioligand)                                                          | -14 | serotonin                                                     |
| 5-HT2A (h) (antagonist radioligand)                                                      | -2  | ketanserin                                                    |
| 5-HT2B (h) (agonist radioligand)                                                         | -11 | (±)DOI                                                        |
| 5-HT2C (h) (antagonist radioligand)                                                      | -5  | RS 102221                                                     |
| 5-HT3 (h) (antagonist radioligand)                                                       | 1   | MDL 72222                                                     |
| 5-HT5a (h) (agonist radioligand)                                                         | -1  | serotonin                                                     |
| 5-HT6 (h) (agonist radioligand)                                                          | -12 | serotonin                                                     |
| 5-HT7 (h) (agonist radioligand)                                                          | 11  | serotonin                                                     |
| sigma (non-selective) (h) (agonist radioligand)                                          | 26  | haloperidol                                                   |
| sst (non-selective) (agonist radioligand)                                                | -3  | somatostatin-14                                               |
| GR (h) (agonist radioligand)                                                             | -3  | dexamethasone                                                 |
| VPAC1 (VIP1) (h) (agonist radioligand)                                                   | -9  | VIP                                                           |
| V1a (h) (agonist radioligand)                                                            | -1  | [d(CH <sub>2</sub> )51,Tyr(Me)2]-AVP                          |
| Ca <sup>2+</sup> channel (L, verapamil site) (phenylalkylamine) (antagonist radioligand) | 1   | D 600                                                         |
| KV channel (antagonist radioligand)                                                      | 0   | alpha -dendrotoxin                                            |
| SKCa channel (antagonist radioligand)                                                    | -4  | apamin                                                        |
| Na <sup>+</sup> channel (site 2) (antagonist radioligand)                                | 1   | veratridine                                                   |
| Cl <sup>-</sup> channel (GABA-gated) (antagonist radioligand)                            | -2  | picrotoxinin                                                  |
| norepinephrine transporter (h) (antagonist radioligand)                                  | 2   | protriptyline                                                 |
| dopamine transporter (h) (antagonist radioligand)                                        | 24  | BTCP                                                          |
| 5-HT transporter (h) (antagonist radioligand)                                            | -1  | imipramine                                                    |

---

|              |    |        |
|--------------|----|--------|
| <b>MMP-1</b> | -3 | GM6001 |
| <b>MMP-2</b> | 5  | GM6001 |
| <b>MMP-3</b> | 5  | GM6001 |
| <b>MMP-9</b> | 10 | GM6001 |

---

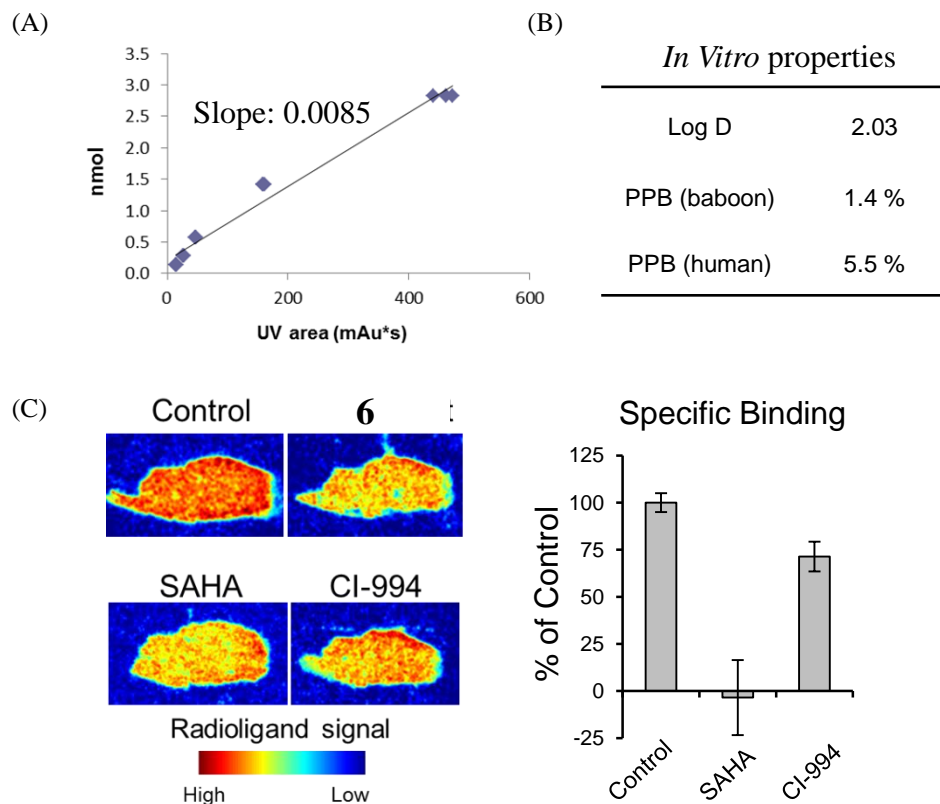

**Figure S1. Characterization of [<sup>11</sup>C]6: *in vitro* properties and *ex vivo* binding.**

(A) Mass/UV calibration curve from five concentrations (0.5, 1.0, 2.0, 5.0, 10.0  $\mu$ M) of standard, unlabeled **6** were made and 100  $\mu$ L of each concentration were injected in triplicate into analytical HPLC column (UV: 254 nm, Agilent; Gemini C18, 250 x 4.6 mm). The resulting slope was subsequently used to determine the specific activity (moles **6** / radioactivity) of known amounts of prepared [<sup>11</sup>C]**6**. (B) Log *D* and Plasma Protein Binding (baboon and human) were measured with [<sup>11</sup>C]**6**. (C) *Ex vivo* [<sup>11</sup>C]**6** binding in sagittal rat brain sections. Compared to Control (5% DMSO), radioligand binding is blocked by preincubation with unlabeled **6** or the HDAC inhibitors, SAHA or CI-994 (each at 100  $\mu$ M) supporting specific binding of **6** to HDAC targets. [<sup>11</sup>C]-signal not blocked by unlabeled **6** (100  $\mu$ M) defined nonspecific binding. Specific binding was calculated as (total binding – nonspecific binding) and expressed as % of control in histogram.

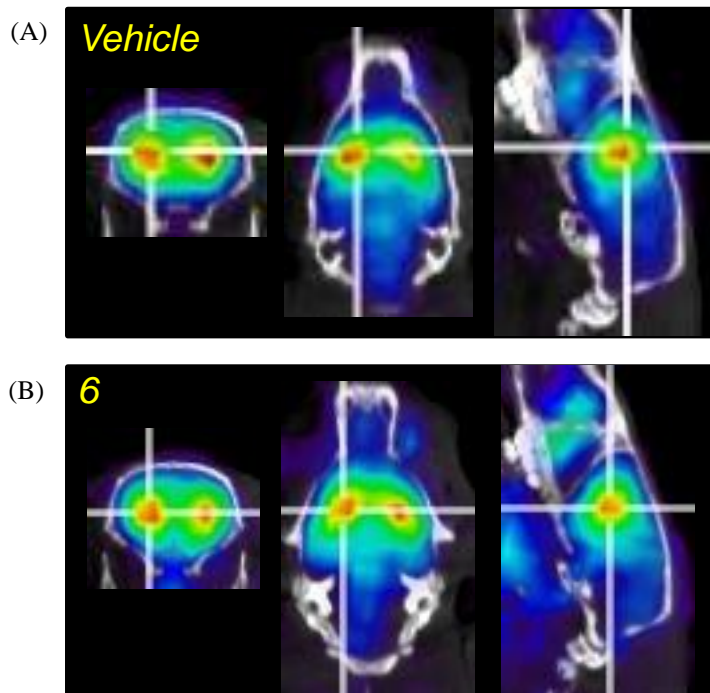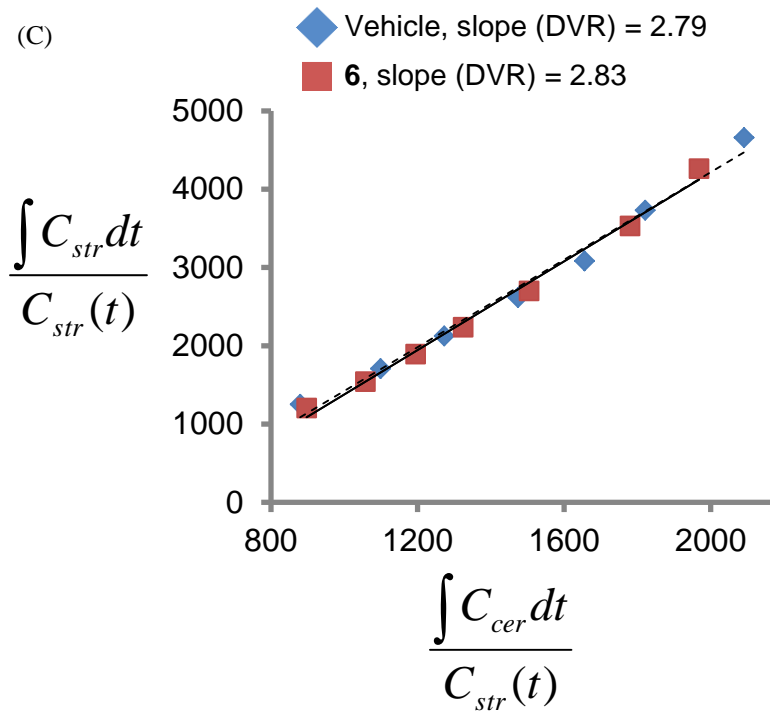

**Figure S2: *In vivo* PET imaging confirms acute 6 does not modulate dopamine transporter (DAT) binding/occupancy.** The established dopamine transporter (DAT) radiotracer [<sup>11</sup>C]β-CFT was used to evaluate DAT density/occupancy in rats treated with either (A) vehicle (10% DMSO; 10% Tween 80; 80% saline) or (B) 6 (1mg/kg) via i.p. injection 90 minutes before tracer injection (n=1/group). Dynamic PET imaging was acquired for 60 minutes and resolved uptake of [<sup>11</sup>C]β-CFT in DAT-rich striatum. Logan distribution volume analysis was conducted for striatum with cerebellum as a reference region, plotted in panel (C), and revealed no impact of 6 treatment on striatal DAT density/occupancy relative to vehicle treated control.

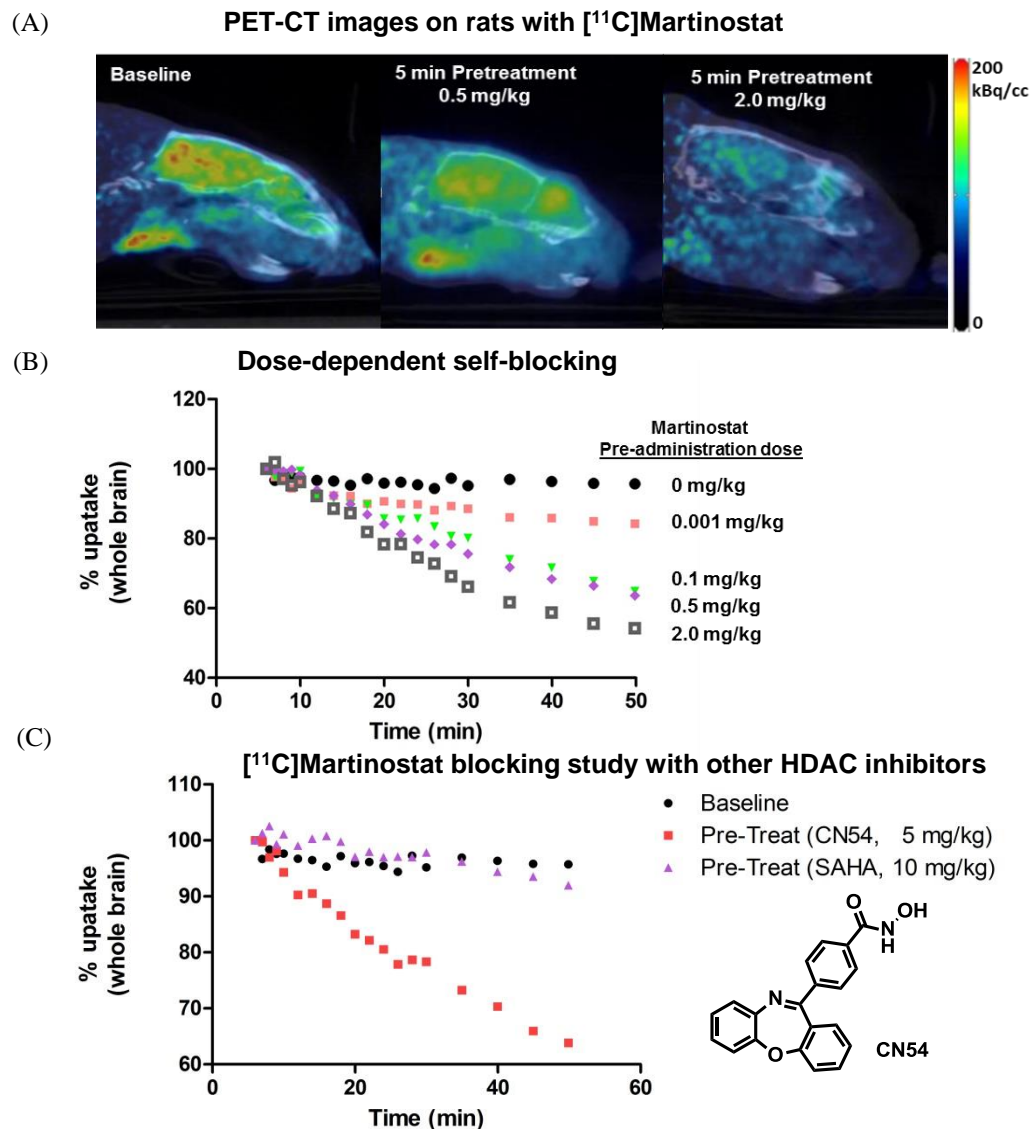

**Figure S3. Rodent *in vivo* PET imaging with [ $^{11}\text{C}$ ]6 reveals robust and blockable uptake in brain.**

(A) Summed PET images (1-60 min) following injection with [ $^{11}\text{C}$ ]6 at baseline or after pretreatment with 0.5, 1.0 or 2.0 mg/kg unlabeled 6 (self blocking); (B) Whole-brain tracer uptake levels, normalized to uptake at 6min, were altered by 10-40% in self-blocking experiments (pretreatment with 0 - 2.0 mg/kg 6); (C) [ $^{11}\text{C}$ ]6 brain uptake was also blocked by 5-min pretreatment with the patent-published HDAC inhibitor CN54 (5mg/kg) but not SAHA (10mg/kg).



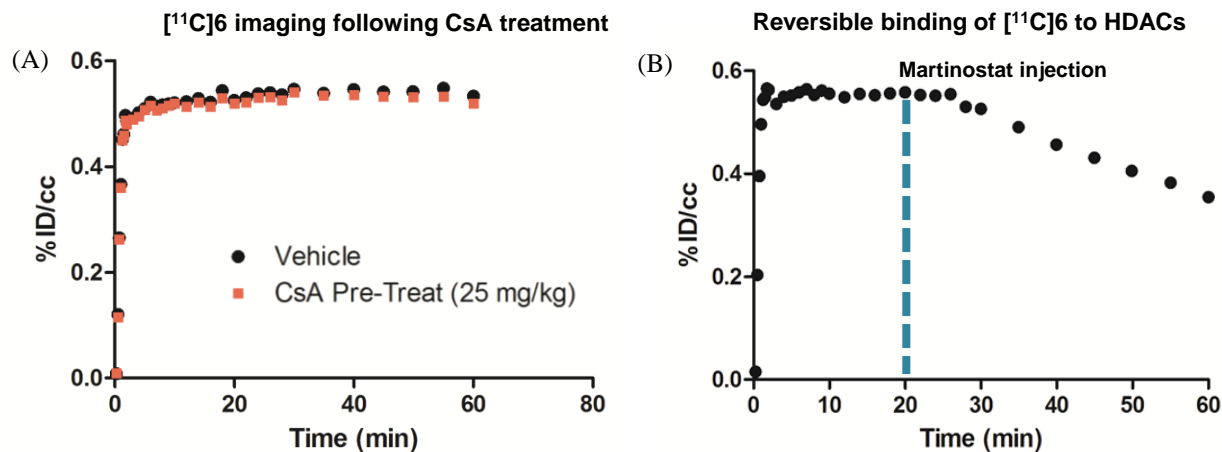

**Figure S4. [11C]6 binding in rat brain is not altered by Pgp inhibition and is reversible.**

(A) Brain uptake of [11C]6 in rats is equivalent 30 min after pretreatment with vehicle (control) or the P-glycoprotein (Pgp) inhibitor cyclosporin A (CsA, 25 mg/kg, i.v.); (B) Equilibrium binding of [11C]6 is disrupted by administration of unlabeled **6** (1.0 mg/kg, i.v.) 20 min after tracer injection, demonstrating reversible HDAC binding in brain.

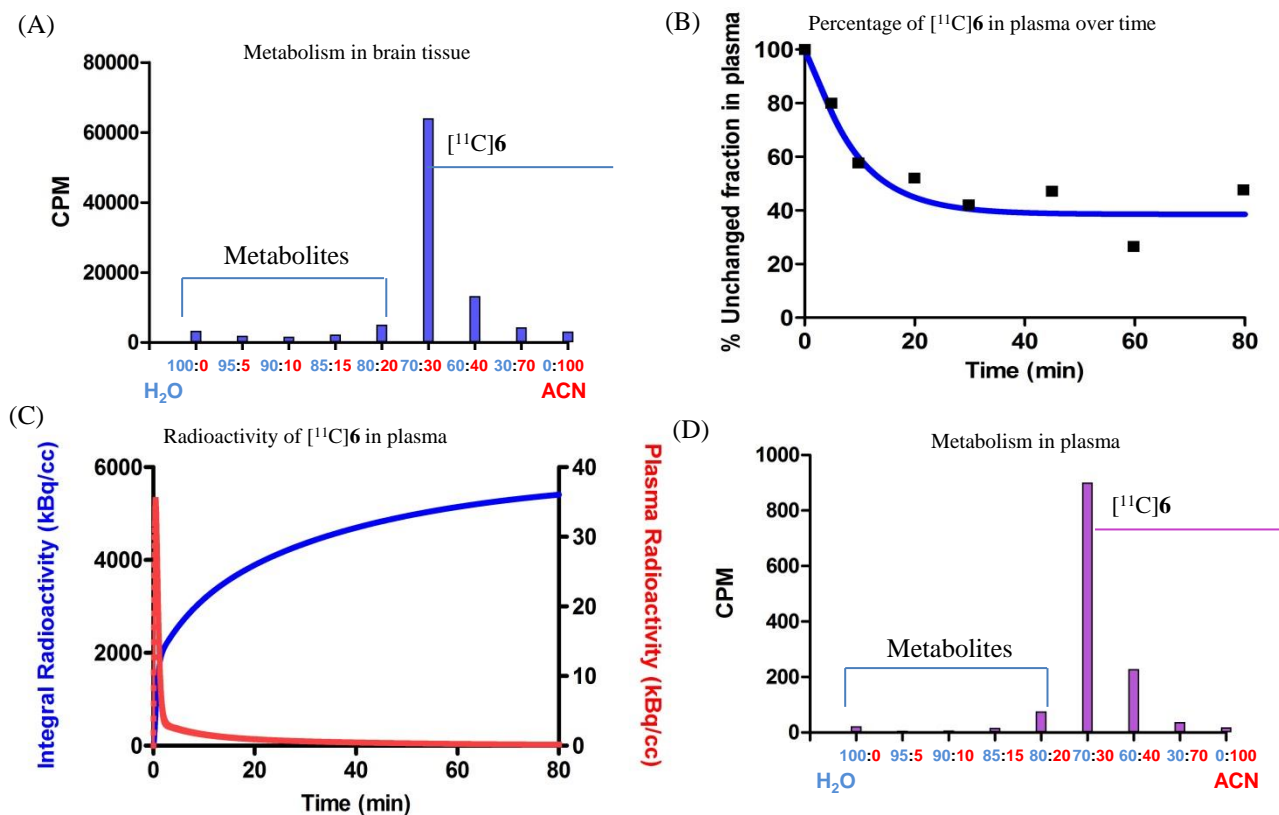

**Figure S5. Radioactive signal from [<sup>11</sup>C]6 is dominated by lasting presence of parent compound.** (A) Radioactivity in rat brain, 30-min post injection as in (A) demonstrates lasting presence of [<sup>11</sup>C]6 in CNS tissue. (B) [<sup>11</sup>C]6 stability evaluated in baboon plasma over time showed lasting presence of 40% of parent compound at timepoints >30min. (C) Dual axis plot of baboon plasma analysis shows [<sup>11</sup>C]6 radioactivity is rapidly cleared from blood (red, right axis) while metabolite-corrected plasma integral (blue, left axis) demonstrates efficient tracer delivery to perfused tissues. (D) Radioactivity, measured in counts per minutes (CPM), was analyzed in baboon plasma 5-min post injection with [<sup>11</sup>C]6. Minimal radioactivity was detected from polar metabolites eluted with high ratios of water to acetonitrile (ACN).

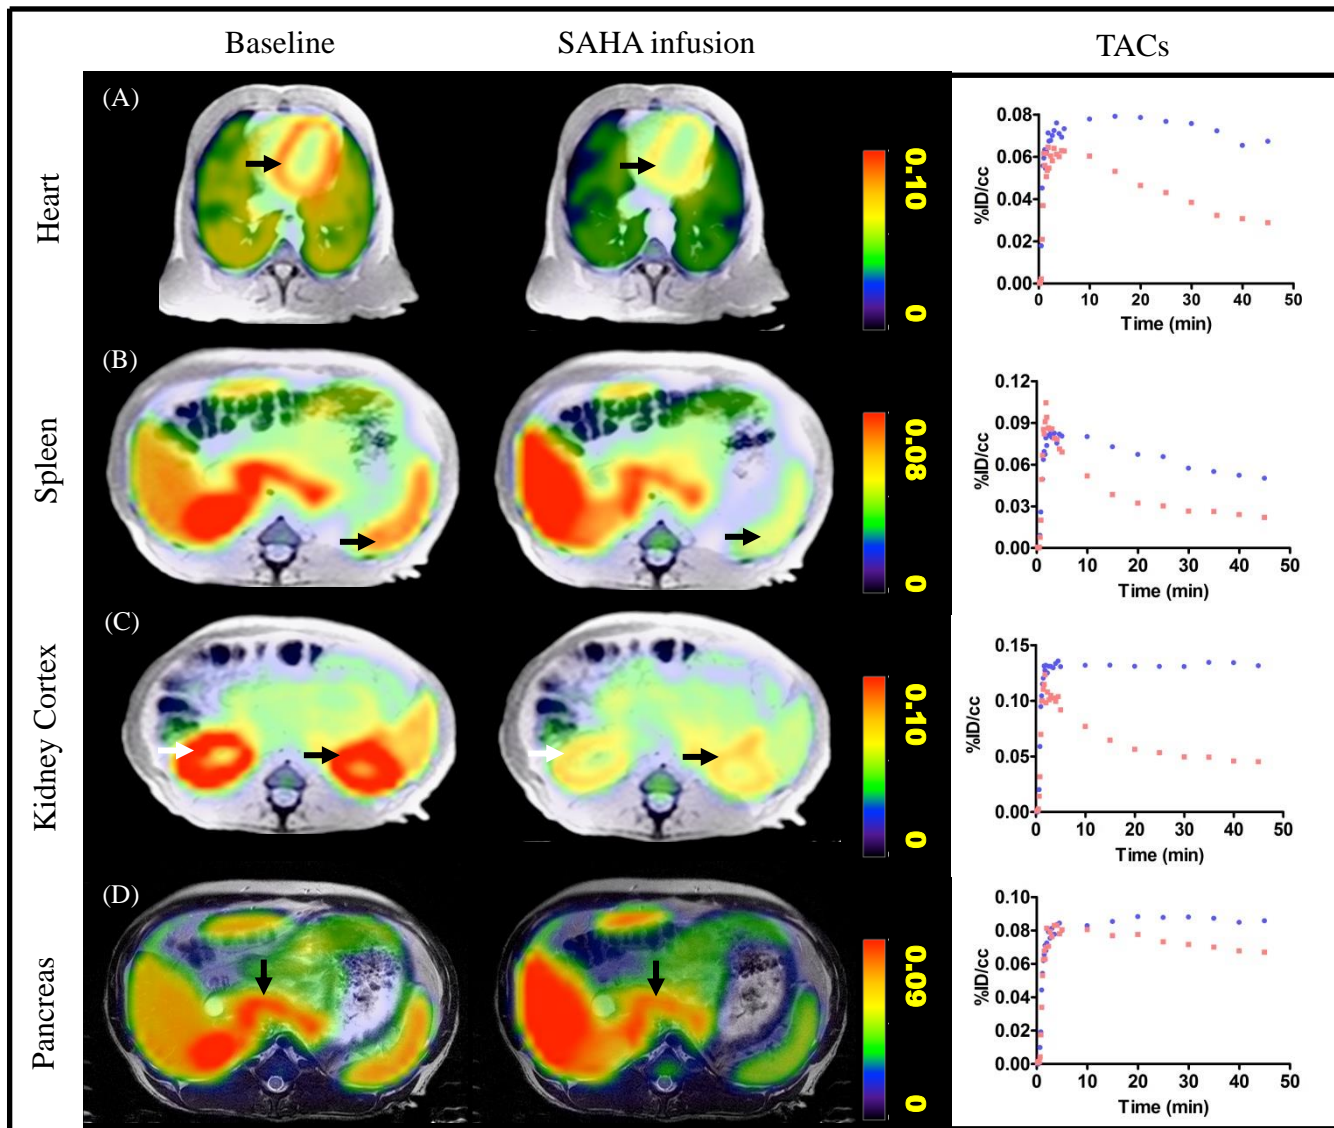

**Figure S6. Organ-specific uptake of  $[^{11}\text{C}]\mathbf{6}$  in baboon is blocked by SAHA treatment.**

SAHA infusion (2.5 mg/kg/hr, i.v.) was initiated 75 min prior to  $[^{11}\text{C}]\mathbf{6}$  administration and continued until the end of PET-MRI imaging (2 hr total). Radiotracer uptake at baseline, visualized in summed images (20-45 min) was reduced by SAHA treatment in organs of interest (arrows) including: A, heart; B, spleen; C, kidney; and D, pancreas. Time activity curves (TACs) show that radiotracer uptake at baseline (blue) was reduced by SAHA infusion (red). SAHA-induced displacement of  $[^{11}\text{C}]\mathbf{6}$  resulted in elevated tracer levels in liver, (B, D) an expected effect due to normal metabolic function.
